# Supplementary material
Source: PubMed Central journal article supplement (PMC4972203)
Supplement: PRO-25-1472-s001.pdf [file PRO-25-1472-s001.pdf]

### Results colour-coded for amino acid conservation

The current colourscheme of the alignment is for amino acid conservation.

The conservation scoring is performed by PRALINE. The scoring scheme works from 0 for the least conserved alignment position, up to 10 for the most conserved alignment position. The colour assignments are:

Unconserved 0 1 2 3 4 5 6 7 8 9 10 Conserved

|             | 10                  | 20                    | 30                    | 40                    | 50                    |
|-------------|---------------------|-----------------------|-----------------------|-----------------------|-----------------------|
| HsMTA1      | -----               | -----                 | -----                 | M AANMYRVGDY          | VYFENSSSNP            |
| MmMTA1      | -----               | -----                 | -----                 | M AANMYRVGDY          | VYFENSSSNP            |
| ScaMTA1     | -----               | -----                 | ---                   | LF-LSDY               | VYFENSSSNP            |
| CmMTA1      | -----               | -----                 | -----                 | M AANMYRVGDY          | VYFENSSSNP            |
| HsMTA2      | -----               | -----                 | -----                 | M AANMYRVGDY          | VYFENSSSNP            |
| DrMTA3      | -----               | -----                 | -----                 | M AANMYRVGDY          | VFFENSSSNP            |
| DmMTA1      | -----               | -----                 | -----                 | M ATNMYRVGDY          | VYVETTPNSP            |
| HlMTA1      | MPMPAEYHEN          | HGNHENANFA            | LGATQDASN             | M TANMYRVGDY          | VYFETSSTSP            |
| Consistency | 0000000000          | 0000000000            | 0000000000            | 7 6 6 7 9 9 7 9 8 **  | * 9 8 * 7 8 8 7 8 *   |
|             | 60                  | 70                    | 80                    | 90                    | 100                   |
| HsMTA1      | YLIRRIEELN          | KTANGNVEAK            | VVCFYRRRDI            | SSTLIALA              | -----                 |
| MmMTA1      | YLIRRIEELN          | KTANGNVEAK            | VVCFYRRRDI            | SSSLIALA              | -----                 |
| ScaMTA1     | YLIRRIEELN          | KTANGNVEAK            | VVCFYRRRDI            | SSTLIVLA              | -----                 |
| CmMTA1      | FLIRRIEELN          | KTANGNVEAK            | VVCFYRRRDI            | PSTLIGLA              | -----                 |
| HsMTA2      | YLVIRRIEELN         | KTANGNVEAK            | VVCLFRRRDI            | SSSLNSLA              | -----                 |
| DrMTA3      | YLIRRIEELN          | KTASGNVEAK            | VVCFYRRRDI            | SQSLIQLA              | -----                 |
| DmMTA1      | YLIRRIEELN          | KNQTGNVEAK            | VMCFYRRRDL            | PNPLVQLADK            | HQLATAEDSP            |
| HlMTA1      | YQIRRIEELN          | KTASGNVEAK            | VMCFFRRRDL            | PSTLIMLADK            | HQLASAEQQR            |
| Consistency | 9 8 9 * * * * * * * | * 8 8 7 * * * * * * * | * 8 * 8 8 * * * * * 8 | 6 7 6 * 7 4 * * * 0 0 | 0 0 0 0 0 0 0 0 0 0   |
|             | 110                 | 120                   | 130                   | 140                   | 150                   |
| HsMTA1      | -----               | DKHAT                 | LSV                   | -----                 | -----                 |
| MmMTA1      | -----               | DKHAT                 | LSV                   | -----                 | -----                 |
| ScaMTA1     | -----               | DKHAS                 | KL                    | -----                 | -----                 |
| CmMTA1      | -----               | DKHAS                 | QEL                   | -----                 | -----                 |
| HsMTA2      | -----               | DSNAR                 | -----                 | -----                 | -----                 |
| DrMTA3      | -----               | DKHAK                 | -----                 | -----                 | -----                 |
| DmMTA1      | LATKLKKTWL          | RTPVSEEQAA            | QAVLDPSIAA            | LDEERTSPTQ            | TSGGGGSATG            |
| HlMTA1      | SE-----             | --SPANTQSQ            | KL-----               | ---ENPDTTK            | EMTNKDGIGP            |
| Consistency | 0 0 0 0 0 0 0 0 0 0 | 0 0 0 0 0 7 6 6 9 4   | 2 2 3 0 0 0 0 0 0 0   | 0 0 0 0 0 0 0 0 0 0   | 0 0 0 0 0 0 0 0 0 0   |
|             | 160                 | 170                   | 180                   | 190                   | 200                   |
| HsMTA1      | CYKAGP              | GAD                   | NGEEGEIEEE            | MENPEMVDLP            | EKLKHQLRHR            |
| MmMTA1      | CYRAGP              | GAD                   | TGEEGEVEEE            | VENPEMVDLP            | EKLKHQLRHR            |
| ScaMTA1     | CVQVTS              | TQN                   | ---FQTEMEEE           | MENPEMVDLP            | EKQKHQLRHR            |
| CmMTA1      | DNCDPALP            | SEVPEVQOET            | LTKSEDLLEE            | METDSLQQLT            | EKQQHQLKHR            |
| HsMTA2      | -----               | -----                 | EFEEEE                | SK---QPGVS            | EQQRHQLKHR            |
| DrMTA3      | -----               | -----                 | DLEEE                 | KESPESDIT             | EKQKHQLRHR            |
| DmMTA1      | NSGSNSSGTS          | NNNSSTAIG             | GGAGSGGAG             | GDAEKGEALT            | SKQRYQIKHR            |
| HlMTA1      | KVMNKGKGGK          | GWLKAPLSEA            | QEPHGMEENV            | VGAGGVTELS            | SKQRHQMKHR            |
| Consistency | 0 0 1 1 2 2 2 2 0 0 | 0 0 0 0 0 0 0 2 2 2   | 0 1 1 2 2 5 3 8 7 6   | 4 6 3 3 3 4 4 5 9 5   | 7 8 6 7 8 * 8 8 * *   |
|             | 210                 | 220                   | 230                   | 240                   | 250                   |
| HsMTA1      | ELFLSRQLES          | LPATHIRGKC            | SVTLLNETES            | LKSYLEREDF            | FFYSLVYDPQ            |
| MmMTA1      | ELFLSRQLES          | LPATHIRGKC            | SVTLLNETES            | LKSYLEREDF            | FFYSLVYDPQ            |
| ScaMTA1     | ELFLSRQLES          | LPATHIRGKC            | SVTLLNETES            | LKSYLEREDF            | FFYSLVYDPQ            |
| CmMTA1      | ELFLSRQLES          | LPATHIRGKC            | SVTLLNETEA            | VFSYLEKEDS            | FFYCLVYDPQ            |
| HsMTA2      | ELFLSRQFES          | LPATHIRGKC            | SVTLLNETDI            | LSQYLEKEDC            | FFYSLVYDFV            |
| DrMTA3      | ELFLSRQYES          | LPATHIRGKC            | SVALLNETEV            | VLSYLEKEDT            | FFYSLVYDPT            |
| DmMTA1      | ELFLSRQVES          | IPATQIRGKC            | SVTLLNETES            | LQSYLNKDDT            | FFYCLVYDFN            |
| HlMTA1      | ELFLSRQVET          | MPATHIRGKC            | CVTLLNETES            | LLSYLNKEDS            | FFYCLVYDFPA           |
| Consistency | * * * * * * * 6 * 8 | 8 * * * * 8 * * * * * | 8 * 8 * * * * * 9 6   | 8 4 8 * * * 7 8 9 * 4 | * * * * 6 * * 8 * * 4 |
|             | 260                 | 270                   | 280                   | 290                   | 300                   |
| HsMTA1      | QKTLLADKGE          | IRVGNRYQAD            | ITDLLK                | EGEEDGRDQS            | RLETQVWEAH            |
| MmMTA1      | QKTLLADKGE          | IRVGNRYQAD            | ITDLLK                | EGEEDGRDQS            | KLETQVWEAH            |
| ScaMTA1     | QKTLLADKGE          | IRVGNRYQAD            | ITDLLK                | EGEDDGRDQS            | KLETQVWEAF            |
| CmMTA1      | QKTLLADKGE          | IRVGNRYQAD            | IPDLLK                | EGEEDGRDQV            | KLEAKIWDTD            |
| HsMTA2      | QKTLLADQGE          | IRVGCYQAE             | IPDRLV                | EGESDNRNQQ            | KMEMKVWDPD            |
| DrMTA3      | QKTLLADKGE          | IRVGNRYQAD            | VPEMLQ                | EGEADDRDQS            | KLEMKMWDPE            |
| DmMTA1      | QKTLLADKGE          | IRVGSRYQCD            | IPAKLK                | DTATDDRKLE            | ELESVWTPPE            |
| HlMTA1      | QRTLLADKGE          | IRVGSRYQAD            | GIAPTPLTPA            | ERESDPRLQ             | DLETLVWTPR            |
| Consistency | * 9 * * * * * 8 * * | * * * * * 4 9 9 * 8 9 | 0 0 0 0 8 6 5 5 7 6   | 9 6 8 5 * 4 * 5 6 5   | 6 9 * 5 5 8 * 5 5 4   |

```

..... 310..... 320..... 330..... 340..... 350
HsMTA1 NPLTDKQIDQ FLVVARSVGT FARALDCSSS VRQPSLHMSA AAASRDITLF
MmMTA1 NPLVDKQIDQ FLVVARSVGT FARALDCSSS VRQPSLHMSA AAASRDITLF
ScaMTA1 NPLVDKQIDQ FLVVARSVGT FARALDCSSS VRQPSLHMSA AAASRDITLF
CmMTA1 NPLTDRQIDQ FLVLARSVGT FARALDCSSS IRQPSLHMSA AAASRDITLF
HsMTA2 NPLTDRQIDQ FLVVARAVGT FARALDCSSS IRQPSLHMSA AAASRDITLF
DrMTA3 CPLTNKQIDQ FLVVARAVGT FARALDCSSS VRQPSLHMSA AAASRDITLF
DmMTA1 HSLTDRKIDQ FLVVSRSIGT FARALDCSSS VKQPSLHMSA AAASRDITLF
HlMTA1 HSLTDRQIDQ FLVVSRSVGT FARALDCSSS VKQPSLHMSA AAASRDITLF
Consistency 57*7888*** **98*89** ***** 98***** *****9***

```

```

..... 360..... 370..... 380..... 390..... 400
HsMTA1 HAMDTLHKNI YDISKAISAL VPQGGPVLCR DEMEEWSASE ANLFEEALEK
MmMTA1 HAMDTLHKNI YDISKAISAL VPQGGPVLCR DEMEEWSASE ANLFEEALEK
ScaMTA1 HAMDTLHKNI YDISKAISAL VPQGGPVLCR DEMEEWSASE ANLFEEALEK
CmMTA1 HSMDTLHKNI YDISKAISAL VPQGGPVLCR DEMEEWSASE ANMFEEALEK
HsMTA2 HAMDTLQRNG YDLAKAMSTL VPQGGPVLCR DEMEEWSASE AMLFEEALEK
DrMTA3 HAMDTLHRHG YDLSSALSVL VPQGGPVLCR DEMEEWSASE ANLFEEALEK
DmMTA1 HAMNIIHKHE YSIEESMSSL VPSTGPVLCR DEIEDWSASE ANLFEEALEK
HlMTA1 HAMDTLHRHN YDVAKAMSSL VPSTGPVLCR DEMEEWSASE ANLFEEALDK
Consistency *9*88*8873 *887797*6* **76***** **8*9**9** *89*****9*

```

```

..... 410..... 420..... 430..... 440..... 450
HsMTA1 YGKDFTDIQQ DFLPWKSLTS IIEYYYMWKT TDRYVQQRK KAAEAESKLLK
MmMTA1 YGKDFTDIQQ DFLPWKSLTS IIEYYYMWKT TDRYVQQRK KAAEAESKLLK
ScaMTA1 YGKDFTDIQQ DFLPWKSLTS IIEYYYMWKT TDRYVQQRK KAAEAESKLLK
CmMTA1 YGKDFSDIRQ DFLPWKALTS IVEYYYMWKT TDRYVQQRK KAAEAESRLK
HsMTA2 YGKDFNDIRQ DFLPWKSLAS IVQFYMWKT TDRYIQQRK KAAEADSKLLK
DrMTA3 YGKDFNDIRQ DFLPWKSLTS IIEYYYMWKT TDRYVQQRK KAAEAESKLLK
DmMTA1 YGKDFNDIRQ DFLPWKTLKQ IIEYYYMWKT TDRYVQQRK KAVEAELKLLK
HlMTA1 YGKDFSDIRQ DFLPWKTLKN VIEYYYMWKT TDRYVQQRK KAVEAESKLLK
Consistency ****6**7* *****7*67 9999***** ****9****8 **7**989**

```

```

..... 460..... 470..... 480..... 490..... 500
HsMTA1 QVYIPNYNKP NPNQI----- SV NN--VKAGVV NGTGAP----
MmMTA1 QVYIPNYNKP NPNQI----- SA SS--VKATVV NGTGTP----
ScaMTA1 QVYIPNYNKP NPNQI----- NV NN--VKPGVV NGTGVQ----
CmMTA1 QVYIPNYNKP NPNQI----- NV NSTVAKSAMV NGAAVP----
HsMTA2 QVYIPTYTKP NPNQI----- IS VG--SKPG-M NGAG-----
DrMTA3 QVYIPTYTKP NPNQI----- SV SN--GKMATV NGAAAG----
DmMTA1 QVYIPQYNNN GKGNG----- TSTKAGGGIY NGTT-----
HlMTA1 QVYIPNYNKT APPTTAPSAA TIVPLGNNNS NSNGKPTNVL NGNSNGNMTT
Consistency ****6*886 68676 00000 000000044 5600463556 **65220000

```

```

..... 510..... 520..... 530..... 540..... 550
HsMTA1 --G--QSPG AGRACESCYT TQSYQWYS--
MmMTA1 --G--QSPG AGRACESCYT TQSYQWYS--
ScaMTA1 --A--QNTG AGRACESCYT TQSYQWYS--
CmMTA1 --G--QNGG AGRACESCYT TQSYQWYS--
HsMTA2 -----FQ KGLTCECHT TQSAQWYA--
DrMTA3 --TGSFHTAG GGRACESCFV VQSAQWYS--
DmMTA1 --NGSTDLS NGKPCESC GT TKS SQWNS VS SGHSTRRLCL SCWEYWRRYG
HlMTA1 DNSGILMVG VSGKPCESC QV MQSPQWY--
Consistency 0031004335 5*66***47 78*4**7600 0000000000 0000000000

```

```

..... 560..... 570..... 580..... 590..... 600
HsMTA1 -----W GPPNMQCRLC ASCWTYWKKY GGLKMPTRLD GE-----
MmMTA1 -----W GPPNMQCRLC ASCWTYWKKY GGLKMPTRLD GE-----
ScaMTA1 -----W GPPNMQCRLC ASCWTYWKKY GGLKMPTRLD GE-----
CmMTA1 -----W GPPNMQCRLC ATCWNYWKKY GGLKMPTRLE GE-----
HsMTA2 -----W GPPNMQCRLC ASCWIYWKKY GGLKTPQLE GA-----
DrMTA3 -----W GPPNMQCRLC VSCWYWKKY GGLKMPSPRAE GAE-----
DmMTA1 SMKSATKGD A GEGDAKKKSS SAASTPTATL AGLATTPTAV VDL-----
HlMTA1 -----AW GPSHMQCRLC QSCWTYWKKY GGLKVP SRMD DVDLERKRGG
Consistency 0000000007 *867887988 6887577888 8**8686766 6500000000

```

```

..... 610..... 620..... 630..... 640..... 650
HsMTA1 -----RPGPNR-- --SNMSPH GLPA--RSS-
MmMTA1 -----RPGPNR-- --NNMSPH GIPA--RSS-
ScaMTA1 -----RPGPNR-- --NNLSPH GVPV--RNS-
CmMTA1 -----RPGPNR-- --SSANPH GYVW--KN--
HsMTA2 -----TRGTTEPHS RGHLSPPEAQ SLSPYTTSA-
DrMTA3 -----EKTP PSPAPNESRS RGHCARQSSH MVPI--RNS-
DmMTA1 --NDDEKISD LTNRQLHRCS IVNCGKEFKL KTHLARHYAQ AHGIAISS--

```

|             |              |             |            |             |             |             |             |         |        |        |
|-------------|--------------|-------------|------------|-------------|-------------|-------------|-------------|---------|--------|--------|
| HlMTA1      | TGSDEESKGI   | GGAHRPHRCS  | IPSCGKEFKL | KAHLSRHYAS  | AHGVDLRGSG  |             |             |         |        |        |
| Consistency | 000000000    | 000000000   | 0455566011 | 1021663556  | 5435006640  |             |             |         |        |        |
|             | .....        | 660.....    | 670.....   | 680.....    | 690.....    | 700.....    |             |         |        |        |
| HsMTA1      | -----        | GSP         | KFAMKTRQAF | YLHTTKLTRI  | ARRLCREILR  | PWHAARHPYL  |             |         |        |        |
| MmMTA1      | -----        | GSP         | KFAMKTRQAF | YLHTTKLTRI  | ARRLCREILR  | PWHAARHPYM  |             |         |        |        |
| ScaMTA1     | -----        | GSP         | KFAMKTRQAF | YLHTTKLTRI  | ARRLCRDILR  | PWHAARHPYL  |             |         |        |        |
| CmMTA1      | -----        | ANP         | KFTLKTRQAF | CLQTTKLTKI  | ARYFCRSLFH  | TRQSARRPFT  |             |         |        |        |
| HsMTA2      | -----        | NRA         | KLLAKNRQTF | LLQTTKLTRL  | ARRMCRDLLQ  | PRRAARRPYA  |             |         |        |        |
| DrMTA3      | -----        | GSP         | KSSMKTQAF  | LLQATRLLTKL | ARRMCRDLIR  | LRRRAARRPFV |             |         |        |        |
| DmMTA1      | -----        | GSP         | RPIMKTRTAF | YLHTNPMTRV  | ARAI CRSIVK | PKKAARQSAY  |             |         |        |        |
| HlMTA1      | ASGGGGG      | GSP         | RPVMKTRSAF | YLRTSALARA  | ARRLCAAQLR  | TRHAARAPHQ  |             |         |        |        |
| Consistency | 0000000      | 778         | 8357*8978* | 5*68769887  | **57*85676  | 5459**5854  |             |         |        |        |
|             | .....        | 710.....    | 720.....   | 730.....    | 740.....    | 750.....    |             |         |        |        |
| HsMTA1      | PINSAAIKAE   | CTA         | RLPEAS     | Q-SPLVLKQA  | V-----      | RKPL        | EAVLRYLETH  |         |        |        |
| MmMTA1      | PINSAAIKAE   | CTA         | RLPEAS     | Q-SPLVLKQV  | V-----      | RKPL        | EAVLRYLETH  |         |        |        |
| ScaMTA1     | PINSAAIKAE   | CTA         | RLPEAS     | E-NPLLLKQV  | V-----      | RKPL        | EAVLRYLESH  |         |        |        |
| CmMTA1      | PINSAAIKAE   | CTA         | RLPEIG     | E-KPIKPKPS  | V-----      | RKTL        | ESI AKYLELH |         |        |        |
| HsMTA2      | PINANAIAKAE  | CSI         | RLPKAA     | K-TPLKIHP   | V-----      | RLPL        | ATIVKDLVAQ  |         |        |        |
| DrMTA3      | PINC GAIAKAE | YMI         | RVSEGM     | TGRPLPKPKSS | P-----      | RSTL        | TSVLQYLESR  |         |        |        |
| DmMTA1      | AINAMLVKQE   | FTN         | RISGKS     | Q-AEIKKLL   | LK-PKDRGSV  |             | TKIANRLGAP  |         |        |        |
| HlMTA1      | PVNAAPLRHL   | CASP        | QLTSKS     | S-VELRILAR  | AVRPRPRPRV  |             | TDIATRLGDH  |         |        |        |
| Consistency | 89*          | 6569967     | 6650       | 886646      | 5047855544  | 600000*     | 448         | 559654* | 545    |        |
|             | .....        | 760.....    | 770.....   | 780.....    | 790.....    | 800.....    |             |         |        |        |
| HsMTA1      | P-----       |             |            |             | RPP         | KPDPVKS     | V-----      | SSV     |        |        |
| MmMTA1      | P-----       |             |            |             | RPP         | KPDPVKS     | V-----      | SSV     |        |        |
| ScaMTA1     | P-----       |             |            |             | CPP         | KPDPAKSL    | V-----      | SSS     |        |        |
| CmMTA1      | P-----       |             |            |             | SV          | KPICSLA     | V-----      | VH      |        |        |
| HsMTA2      | A-----       |             |            |             | PL          | KPKTPRGT    | V-----      | K--     |        |        |
| DrMTA3      | P-----       |             |            |             | AT          | HVQRPHRT    | V-----      | PGL     |        |        |
| DmMTA1      | G----        | SGPHE       | WLVLT      | PKDKM       | PLPAVVS     | FPK         | PPKAPDGS    | LV      | YDRV   | PNKSPD |
| HlMTA1      | PAPRQPGDWD   | WLALTA      | AAAQR      | KQPD        | RVSFPR      | PPKAPDGS    | LL          | YERV    | PNKSEV |        |
| Consistency | 6000000000   | 0000000000  | 00000001   | 63          | 58434354    | 00          | 0000000     | 532     |        |        |
|             | .....        | 810.....    | 820.....   | 830.....    | 840.....    | 850.....    |             |         |        |        |
| HsMTA1      | LSSLTPAKVA   | PVINNGSPTI  | LGKR--     | SYEQ        | HNGVDGNMCK  | RLLMPSRGLA  |             |         |        |        |
| MmMTA1      | LSSLTPAKSA   | PVINNGSPTI  | LGKR--     | SYEQ        | HNGVDGNMCK  | RLLMPSRGLA  |             |         |        |        |
| ScaMTA1     | LNNLTPAKFT   | PVINNGSPTI  | LGKR--     | SYEQ        | HNGMDGNMCK  | RLLMPSRGLP  |             |         |        |        |
| CmMTA1      | SGSVTPAKIL   | PVLNHGSPTI  | LGKR--     | GYEQ        | HNGIDGTMCK  | RLLMPPFRGKT |             |         |        |        |
| HsMTA2      | -TPINRNQLS   | Q--NRGLGGI  | MVKR--     | AYET        | MAG-----    |             |             |         |        |        |
| DrMTA3      | QVQPPRRLLS   | SLPSHGPLGM  | LGKR--     | SYHH        | HSRVESAERR  | AGATG-----  |             |         |        |        |
| DmMTA1      | VVAVPADKEL   | TIIPTQATST  | IRKRAHEDQ  | Q           | LNGTEVTIVP  | SGPPAKRPNK  |             |         |        |        |
| HlMTA1      | DRLTVTPPQP   | QPSMQAQQTI  | LKRTRPPFDE | INGSDGIALS  | AGLPGGPPAK  |             |             |         |        |        |
| Consistency | 2345444534   | 5435465367  | 849800     | 5766        | 5784643444  | 4343323322  |             |         |        |        |
|             | .....        | 860.....    | 870.....   | 880.....    | 890.....    | 900.....    |             |         |        |        |
| HsMTA1      | -----        | NHGQARHM    | GP-SRNLLL  | N           | GKSYP       | TKVRL       | IRGGS       | LPPVK   |        |        |
| MmMTA1      | -----        | NHGQTRHM    | GP-SRNLLL  | N           | GKSYP       | TKVRL       | IRGGS       | LPPVK   |        |        |
| ScaMTA1     | -----        | NHGQTRQM    | GP-SRNLLL  | N           | GKSYP       | TKVRL       | IRGGS       | MPPVK   |        |        |
| CmMTA1      | LAQSCSRLHS   | HPNHGQVRQM  | AAVNR      | GYMIN       | GKPY        | SRSSKI      | LKPGS       | LPPMK   |        |        |
| HsMTA2      | -----        |             | A--GVP     | FSAN        | GRPLA       | ---SG       | IRSSS       | QPAAK   |        |        |
| DrMTA3      | -----        | QENPAHI     | V--GPI     | LQHN        | GSSTG       | ---GS       | SLRGS       | GLMLR   |        |        |
| DmMTA1      | DPMPSHCPSP   | EQFAAMMAAS  | GQPLSRHHLN | GKQ----     | KI          | AQMARGGNGR  |             |         |        |        |
| HlMTA1      | RAHHSQQLHP   | KHTLEHTAPT  | VLPLAPPLNG | RAAHPHTLPH  | GPPLSRSNAR  |             |             |         |        |        |
| Consistency | 0000000000   | 0023343434  | 5204434448 | 8653312243  | 4535834458  |             |             |         |        |        |
|             | .....        | 910.....    | 920.....   | 930.....    | 940.....    | 950.....    |             |         |        |        |
| HsMTA1      | RRRMNWIDAP   | DDVIFYMATEE | TRKIRKLLSS | SETKRAARRP  | YKPIALRQSQ  |             |             |         |        |        |
| MmMTA1      | RRRMNWIDAP   | DDVIFYMATEE | TRKIRKLLSS | SETKRAARRP  | YKPIALRQSQ  |             |             |         |        |        |
| ScaMTA1     | RRRMNWIDAP   | DDVIFYMATEE | TRKIRKLLSS | SEAKRAARRP  | YKPIILRP--  |             |             |         |        |        |
| CmMTA1      | GRRMNWIDAP   | DDVLFIMATEE | TRKIRKLLGP | VDMKRAARQP  | YKQIFIRQAR  |             |             |         |        |        |
| HsMTA2      | RQKLN PADAP  | NPVV FVATKD | TRALRKAL   | TH          | LEMRRARRP   | NLPLKVKPTL  |             |         |        |        |
| DrMTA3      | KRRPNWIDAP   | DDSFFLVSRE  | TRKARRMLSR | SQLRRACRQP  | CEQISLRRVP  |             |             |         |        |        |
| DmMTA1      | KQVISWMDAP   | DDVYFRANDT  | HKKTRKILSA | VDLRRAARKP  | WRTLPIKP--  |             |             |         |        |        |
| HlMTA1      | KQVISWMDAP   | DDVYFRASDQ  | TKRLRKTLSS | VELRRAARKP  | WRRLPAPL--  |             |             |         |        |        |
| Consistency | 6756876***   | 8886858766  | 7876*96*75 | 5758**8*7*  | 4648376411  |             |             |         |        |        |
|             | .....        | 960.....    | 970.....   |             |             |             |             |         |        |        |
| HsMTA1      | A----        | LPPRP       | PPP-APV    | NDE         | PIVIED      |             |             |         |        |        |
| MmMTA1      | A----        | LPLRP       | PPP-APV    | NDE         | PIVIED      |             |             |         |        |        |
| ScaMTA1     | -----        | MQAV        | QLR-QPM    | NDE         | PIIIED      |             |             |         |        |        |
| CmMTA1      | V----        | SCAVS       | QPSRQP     | VNEE        | PIIIED      |             |             |         |        |        |
| HsMTA2      | I            | AVRPPVPLP   | APSH       | PASTNE      | PIVLED      |             |             |         |        |        |

|             |   |   |   |   |   |   |   |   |   |   |   |   |   |   |   |   |   |   |   |   |   |   |   |   |   |   |   |   |   |
|-------------|---|---|---|---|---|---|---|---|---|---|---|---|---|---|---|---|---|---|---|---|---|---|---|---|---|---|---|---|---|
| DrMTA3      | Q | G | P | S | Q | V | P | I | L | A | P | P | H | P | S | L | R | M | R | G | P | I | V | I | H | D |   |   |   |
| DmMTA1      | - | - | - | - | - | - | - | - | - | - | A | A | P | E | P | S | - | S | R | P | I | E | S | Q | I | V | I | L | D |
| HlMTA1      | - | - | - | - | - | - | - | - | - | - | H | P | P | H | P | Q | R | A | V | R | G | D | D | M | V | V | I | L | D |
| Consistency | 1 | 0 | 0 | 0 | 1 | 2 | 3 | 3 | 5 | 4 | 7 | 4 | 0 | 5 | 4 | 3 | 4 | 6 | 6 | 6 | 9 | 9 | 9 | 5 | * |   |   |   |   |
