# Supplementary material
Source: PubMed Central journal article supplement (PMC4972203)
Supplement: PRO-25-1472-s002.pdf [file PRO-25-1472-s002.pdf]

## Results colour-coded for secondary structure

The current colourscheme of the alignment is for **secondary structure type**.

The 3-state (H, E C) secondary structure for each sequence is represented by a colour. If a sequence in the alignment has no colours assigned, this means that either there is no DSSP information available (if this was requested), or that no prediction was possible for that sequence (if this was requested).

The colour assignments are:

**HELIX (H)** **STRAND (E)** You have selected to perform secondary structure prediction using **DSSP** (Kabsch and Sander, 1983) and **Porter** (Pollastri and McLysaght, 2005).

|        |         |                     |                    |                     |                    |                      |                    |
|--------|---------|---------------------|--------------------|---------------------|--------------------|----------------------|--------------------|
|        |         | ..... 10            | ..... 20           | ..... 30            | ..... 40           | ..... 50             |                    |
| (PRED) | HsMTA1  | -----               | -----              | -----M              | AANMYRVGDY         | VYFENSSSNP           |                    |
| (PRED) | MmMTA1  | -----               | -----              | -----M              | AANMYRVGDY         | VYFENSSSNP           |                    |
| (PRED) | ScaMTA1 | -----               | -----              | -----               | ---LF-LSDY         | VYFENSSSNP           |                    |
| (PRED) | CmMTA1  | -----               | -----              | -----M              | AANMYRVGDY         | VYFENSSSNP           |                    |
| (PRED) | HsMTA2  | -----               | -----              | -----M              | AANMYRVGDY         | VYFENSSSNP           |                    |
| (PRED) | DrMTA3  | -----               | -----              | -----M              | AANMYRVGDY         | VFFENSSSNP           |                    |
| (PRED) | DmMTA1  | -----               | -----              | -----M              | ATNMYRVGDY         | VYVETTPNSP           |                    |
| (PRED) | HlMTA1  | MPMPA <b>EY</b> HEN | HGNHENANFA         | LGATQD <b>ASN</b> M | <b>TAN</b> MYRVGDY | VYFETSSTSP           |                    |
|        |         | ..... 60            | ..... 70           | ..... 80            | ..... 90           | ..... 100            |                    |
| (PRED) | HsMTA1  | <b>YLIRRIEELN</b>   | <b>KTANGNVEAK</b>  | <b>VVCFYRRRDI</b>   | <b>SSTLIALA</b>    | -----                |                    |
| (PRED) | MmMTA1  | <b>YLIRRIEELN</b>   | <b>KTANGNVEAK</b>  | <b>VVCFYRRRDI</b>   | <b>SSSLIALA</b>    | -----                |                    |
| (PRED) | ScaMTA1 | <b>YLIRRIEELN</b>   | <b>KTANGNVEAK</b>  | <b>VVCFYRRRDI</b>   | <b>SSTLIVLA</b>    | -----                |                    |
| (PRED) | CmMTA1  | <b>FLIRRIEELN</b>   | <b>KTANGNVEAK</b>  | <b>VVCFYRRRDI</b>   | <b>PSTLIGLA</b>    | -----                |                    |
| (PRED) | HsMTA2  | <b>YLVRRIEELN</b>   | <b>KTANGNVEAK</b>  | <b>VVCLFRRRDI</b>   | <b>SSSLNSLA</b>    | -----                |                    |
| (PRED) | DrMTA3  | <b>YLIRRIEELN</b>   | <b>KTASGNVEAK</b>  | <b>VVCFYRRRDI</b>   | <b>SQSLIQLA</b>    | -----                |                    |
| (PRED) | DmMTA1  | <b>YLIRRIEELN</b>   | <b>KNQTNVEAK</b>   | <b>VMCFYRRRDL</b>   | <b>PNPLVQLADK</b>  | <b>HQLATAEDSP</b>    |                    |
| (PRED) | HlMTA1  | <b>YQIRRIEELN</b>   | <b>KTASGNVEAK</b>  | <b>VMCFYRRRDL</b>   | <b>PSTLIMLADK</b>  | <b>HQLASAEQQR</b>    |                    |
|        |         | ..... 110           | ..... 120          | ..... 130           | ..... 140          | ..... 150            |                    |
| (PRED) | HsMTA1  | -----               | <b>DKHAT</b>       | <b>LSV</b>          | -----              | -----                |                    |
| (PRED) | MmMTA1  | -----               | <b>DKHAT</b>       | <b>LSV</b>          | -----              | -----                |                    |
| (PRED) | ScaMTA1 | -----               | <b>DKHAS</b>       | <b>KLV</b>          | -----              | -----                |                    |
| (PRED) | CmMTA1  | -----               | <b>DKHAS</b>       | <b>QEL</b>          | -----              | -----                |                    |
| (PRED) | HsMTA2  | -----               | <b>DSNAR</b>       | -----               | -----              | -----                |                    |
| (PRED) | DrMTA3  | -----               | <b>DKHAK</b>       | -----               | -----              | -----                |                    |
| (PRED) | DmMTA1  | LATK <b>LKKTWL</b>  | RTPV <b>SEEQAA</b> | <b>QAVLDP</b>       | <b>SIAA</b>        | LDEERT <b>SPTQ</b>   | <b>TSGG</b> GGSATG |
| (PRED) | HlMTA1  | SE-----             | --SPANT <b>QSQ</b> | KL-----             | ---ENPD <b>TTK</b> | <b>EMTN</b> KDGIGP   |                    |
|        |         | ..... 160           | ..... 170          | ..... 180           | ..... 190          | ..... 200            |                    |
| (PRED) | HsMTA1  | -- <b>CYKAGP</b> -- | -----GAD           | <b>NGEEGEIEEE</b>   | MENPE <b>MVDLP</b> | <b>EKLKHQLRHR</b>    |                    |
| (PRED) | MmMTA1  | -- <b>CYRAGP</b> -- | -----GAD           | <b>TGEEGEVEEEE</b>  | VENPE <b>MVDLP</b> | <b>EKLKHQLRHR</b>    |                    |
| (PRED) | ScaMTA1 | -- <b>CVQVTS</b> -- | -----TQN           | -- <b>FQTEMEEEE</b> | MENPE <b>MVDLP</b> | <b>EKQKHQLRHR</b>    |                    |
| (PRED) | CmMTA1  | -- <b>DNCDPALP</b>  | SEVPE <b>VQOET</b> | <b>LTKSEDL</b> EEE  | METD <b>SLQQLT</b> | <b>EKQQHQLKHR</b>    |                    |
| (PRED) | HsMTA2  | -----               | -----              | <b>EFEEE</b>        | SK-- <b>QPGVS</b>  | <b>EQQRHQLKHR</b>    |                    |
| (PRED) | DrMTA3  | -----               | -----              | <b>DLEEE</b>        | KESP <b>ESDLT</b>  | <b>EKQKHQLRHR</b>    |                    |
| (PRED) | DmMTA1  | NSGS <b>NSSGTS</b>  | <b>NNSSSTAIG</b>   | <b>GGAGGSGGAG</b>   | GDAEK <b>GEALT</b> | <b>SKQRYQIKHR</b>    |                    |
| (PRED) | HlMTA1  | KVMNK <b>GGGKG</b>  | GWLK <b>APLSEA</b> | <b>QEPHGMEENV</b>   | VGAG <b>GVTELS</b> | <b>SKQR</b> HQMKHR   |                    |
|        |         | ..... 210           | ..... 220          | ..... 230           | ..... 240          | ..... 250            |                    |
| (PRED) | HsMTA1  | <b>ELFLSRQLES</b>   | <b>LPATHIRGKC</b>  | <b>SVTLLNETES</b>   | <b>LKSYLEREDF</b>  | <b>FFYSLVYDPQ</b>    |                    |
| (PRED) | MmMTA1  | <b>ELFLSRQLES</b>   | <b>LPATHIRGKC</b>  | <b>SVTLLNETES</b>   | <b>LKSYLEREDF</b>  | <b>FFYSLVYDPQ</b>    |                    |
| (PRED) | ScaMTA1 | <b>ELFLSRQLES</b>   | <b>LPATHIRGKC</b>  | <b>SVTLLNETES</b>   | <b>LKSYLEREDF</b>  | <b>FFYSLVYDPQ</b>    |                    |
| (PRED) | CmMTA1  | <b>ELFLSRQLES</b>   | <b>LPATHIRGKC</b>  | <b>SVTLLNETEA</b>   | <b>VFSYLEKEDS</b>  | <b>FFYCLVYDPQ</b>    |                    |
| (PRED) | HsMTA2  | <b>ELFLSRQFES</b>   | <b>LPATHIRGKC</b>  | <b>SVTLLNETDI</b>   | <b>LSQYLEKEDC</b>  | <b>FFYSLVYDPV</b>    |                    |
| (PRED) | DrMTA3  | <b>ELFLSRQYES</b>   | <b>LPATHIRGKC</b>  | <b>SVALLN</b> ETEV  | <b>VLSYLEKEDT</b>  | <b>FFYSLVYDPT</b>    |                    |
| (PRED) | DmMTA1  | <b>ELFLSRQVES</b>   | <b>IPATQIRGKC</b>  | <b>SVTLLNETES</b>   | <b>LQSYLN</b> KDDT | <b>FFYCLVYDPN</b>    |                    |
| (PRED) | HlMTA1  | <b>ELFLSRQVET</b>   | <b>MPATHIRGKC</b>  | <b>CVTLLNETES</b>   | <b>LLSYLN</b> KEDS | <b>FFYCLVYDPA</b>    |                    |
|        |         | ..... 260           | ..... 270          | ..... 280           | ..... 290          | ..... 300            |                    |
| (PRED) | HsMTA1  | <b>QKTL</b> LADKGE  | <b>IRVGNRYQAD</b>  | ---- <b>ITDLLK</b>  | <b>EGEEDGRD</b>    | <b>QS RLETQVWEAH</b> |                    |
| (PRED) | MmMTA1  | <b>QKTL</b> LADKGE  | <b>IRVGNRYQAD</b>  | ---- <b>ITDLLK</b>  | <b>EGEEDGRD</b>    | <b>QS KLETKVWEAH</b> |                    |
| (PRED) | ScaMTA1 | <b>QKTL</b> LADKGE  | <b>IRVGNRYQAD</b>  | ---- <b>ITDLLK</b>  | <b>EGEDDGRD</b>    | <b>QS KLETKVWEAF</b> |                    |
| (PRED) | CmMTA1  | <b>QKTL</b> LADKGE  | <b>IRVGPRYQAD</b>  | ---- <b>IPDLLK</b>  | <b>EGEEDGRD</b>    | <b>QV KLEAKIWDTD</b> |                    |
| (PRED) | HsMTA2  | <b>QKTL</b> LADQGE  | <b>IRVGCKYQAE</b>  | ---- <b>IPDRLV</b>  | <b>EGESDNRN</b>    | <b>QQ KMEMKVWDPD</b> |                    |
| (PRED) | DrMTA3  | <b>QKTL</b> LADKGE  | <b>IRVGPRFQAD</b>  | ---- <b>VPEMLQ</b>  | <b>EGEADDRD</b>    | <b>QS KLEMKMWDPE</b> |                    |
| (PRED) | DmMTA1  | <b>QKTL</b> LADKGE  | <b>IRVGSRYQCD</b>  | ---- <b>IPAKLK</b>  | <b>DTATDDRKLE</b>  | <b>ELES</b> LVWTPE   |                    |
| (PRED) | HlMTA1  | <b>QRT</b> LADKGE   | <b>IRVGSRYQAD</b>  | GIAPT <b>PLTPA</b>  | <b>ERESDPRRLQ</b>  | <b>DLET</b> LVWTPR   |                    |
|        |         | ..... 310           | ..... 320          | ..... 330           | ..... 340          | ..... 350            |                    |
| (PRED) | HsMTA1  | NPL <b>TDKQIDQ</b>  | <b>FLVVARSVGT</b>  | <b>FARALDCSSS</b>   | <b>VRQPSLHMSA</b>  | <b>AAASRDITLF</b>    |                    |
| (PRED) | MmMTA1  | NPL <b>VDKQIDQ</b>  | <b>FLVVARSVGT</b>  | <b>FARALDCSSS</b>   | <b>VRQPSLHMSA</b>  | <b>AAASRDITLF</b>    |                    |

```

(PRED) ScaMTA1 NPLV DKQIDQ FLVVARSVGT FARALDCSSS VRQPSLHMSA AAASRDITLF
(PRED) CmMTA1 NPLT DRQIDQ FLVLARSVGT FARALDCSSS IRQPSLHMSA AAASRDVTLF
(PRED) HsMTA2 NPLT DRQIDQ FLVVARAVGT FARALDCSSS IRQPSLHMSA AAASRDITLF
(PRED) DrMTA3 CPLT NKQIDQ FLVVARAVGT FARALDCSSS VRQPSLHMSA AAASRDITLF
(PRED) DmMTA1 HSLT DRKIDQ FLVVSRSIGT FARALDCSSS VKQPSLHMSA AAASRDITLF
(PRED) HlMTA1 HSLT DRQIDQ FLVVSRSVGT FARALDCSSS VKQPSLHMSA AAASRDITLF

..... 360..... 370..... 380..... 390..... 400
(PRED) HsMTA1 HAMDTLHKNI YDISKAISAL VPQGGPVLCR DEMEEWSASE ANLFEEALEK
(PRED) MmMTA1 HAMDTLHKNI YDISKAISAL VPQGGPVLCR DEMEEWSASE ANLFEEALEK
(PRED) ScaMTA1 HAMDTLHKNV YDISKAISAL VPQGGPVLCR DEMEEWSASE ANLFEEALEK
(PRED) CmMTA1 HSMDTLHKNN YDVSKAISAL VPQGGPVLCR DEMEEWSASE ANMFEEALEK
(PRED) HsMTA2 HAMDTLQRNG YDLAKAMSTL VPQGGPVLCR DEMEEWSASE AMLFEEALEK
(PRED) DrMTA3 HAMDTLHRHG YDLSSALSVL VPQGGPVLCR DEMEEWSASE ANLFEEALEK
(PRED) DmMTA1 HAMNILLKHE YSIEESMSSL VPSTGPNVLCR DEIEDWSASE ANLFEEALEK
(PRED) HlMTA1 HAMDTLHRHN YDVAKAMSSL VPSTGPNVLCR DEMEEWSASE ANLFEEALDK

..... 410..... 420..... 430..... 440..... 450
(PRED) HsMTA1 YGKDFTDIQQ DFLPWKSLTS IIEYYMVKKT TDRYVQQRK KAAEAESKLLK
(PRED) MmMTA1 YGKDFTDIQQ DFLPWKSLTS IIEYYMVKKT TDRYVQQRK KAAEAESKLLK
(PRED) ScaMTA1 YGKDFTDIQQ DFLPWKSLTS IIEYYMVKKT TDRYVQQRK KAAEAESKLLK
(PRED) CmMTA1 YGKDFSDIRQ DFLPWKALTS IVEYYMVKKT TDRYVQQRK KAAEAESRLK
(PRED) HsMTA2 YGKDFNDIRQ DFLPWKSLAS IVQFYMVKKT TDRYIQQRK KAAEADSKLLK
(PRED) DrMTA3 YGKDFNDIRQ DFLPWKSLTS IIEYYMVKKT TDRYVQQRK KAAEAESKLLK
(PRED) DmMTA1 YGKDFNDIRQ DFLPWKTLKQ IIEYYMVKKT TDRYVQQRV KAVEAELKLLK
(PRED) HlMTA1 YGKDFSDIRQ DFLPWKTLKN VIEYYMVKKT TDRYVQQRV KAVEAESKLLK

..... 460..... 470..... 480..... 490..... 500
(PRED) HsMTA1 QVYIPNYNKP NPNQI-----SV NN--VKAGVV NGTGAP----
(PRED) MmMTA1 QVYIPNYNKP NPNQI-----SA SS--VKATVV NGTGTP----
(PRED) ScaMTA1 QVYIPNYNKP NPNQI-----NV NN--VKPGVV NGTGVQ----
(PRED) CmMTA1 QVYIPNYNKP NPNQI-----NV NSTVAKSAMV NGAAMP----
(PRED) HsMTA2 QVYIPTYTKP NPNQI-----IS VG--SKPG-M NGAG-----
(PRED) DrMTA3 QVYIPTYNKP NPNQI-----SV SN--GKMATV NGAAAG----
(PRED) DmMTA1 QVYIPQYNNN GKGNG-----TSTKAGGGIY NGTT-----
(PRED) HlMTA1 QVYIPNYNKT APPTTAPSAA TIVPLGNNNS NSNGKPTNVL NGNSNGNMTT

..... 510..... 520..... 530..... 540..... 550
(PRED) HsMTA1 --G---QSPG AGRACESCYT TQSYQWYS--
(PRED) MmMTA1 --G---QSPG AGRACESCYT TQSYQWYS--
(PRED) ScaMTA1 --A---QNTG AGRACESCYT TQSYQWYS--
(PRED) CmMTA1 --G---QNGG AGRACESCYT TQSYQWYS--
(PRED) HsMTA2 -----FQ KGLTCESCHT TQSAQWYA--
(PRED) DrMTA3 --TGSFHTAG GGRACESCFV VQSAQWYS--
(PRED) DmMTA1 --NGSTDLS NGKPCESCGT TKSSQWNSVS SGHSTSRLCL SCWEYWRRYG
(PRED) HlMTA1 DN SGILMVG V SGKPCESCQV MQSPQWY---

..... 560..... 570..... 580..... 590..... 600
(PRED) HsMTA1 -----W GPPNMQCRLC ASCWTYWKKY GGLKMPTRLD GE-----
(PRED) MmMTA1 -----W GPPNMQCRLC ASCWTYWKKY GGLKMPTRLD GE-----
(PRED) ScaMTA1 -----W GPPNMQCRLC ASCWTYWKKY GGLKMPTRLD GE-----
(PRED) CmMTA1 -----W GPPNMQCRLC ATCWNYWKKY GGLKMPTRLE GE-----
(PRED) HsMTA2 -----W GPPNMQCRLC ASCWIYWKKY GGLKTPPTLE GA-----
(PRED) DrMTA3 -----W GPPNMQCRLC VSCWYWKKY GGLKMPSRAE GAE-----
(PRED) DmMTA1 SMKSATKGD GEGDAKKKSS SAASTPTATL AGLATTPTAV VDL-----
(PRED) HlMTA1 -----AW GPSHMQCRLC QSCWTYWKKY GGLKVP SRMD DVDLERKRGG

..... 610..... 620..... 630..... 640..... 650
(PRED) HsMTA1 ----- -RPGPNR--- ----SNMSPH GLPA--RSS-
(PRED) MmMTA1 ----- -RPGPNR--- ----NNMSPH GIPA--RSS-
(PRED) ScaMTA1 ----- -RPGPNR--- ----NNLSPH GVPV--RNS-
(PRED) CmMTA1 ----- -RPGPNR--- ----SSANPH GYVW--KN--
(PRED) HsMTA2 ----- -TRGTTEPHS RGHLSPPEAQ SLSPYT TSA-
(PRED) DrMTA3 ----- -EKTP PSPAPNESRS RGHCARQSSH MVPI--RNS-
(PRED) DmMTA1 --NDDEKISD LTNRQLHRCS IVNCGKEFKL KTHLARHYAQ AHGIAISS--
(PRED) HlMTA1 TGSDEESKGI GGAHRPHRCS IPSCGKEFKL KAHLRHYAS AHGVDLRGSG

..... 660..... 670..... 680..... 690..... 700
(PRED) HsMTA1 -----GSP KFAMKTRQAF YLHTTKLTRI ARRLCREILR PWHAAARHPYL
(PRED) MmMTA1 -----GSP KFAMKTRQAF YLHTTKLTRI ARRLCREILR PWHAAARHPYM
(PRED) ScaMTA1 -----GSP KFAMKTRQAF YLHTTKLTRI ARRLCRDILR PWHAAARHPYL
(PRED) CmMTA1 -----ANP KFTLKTRQAF CLQTTKLT KI ARYFCRSLFH TRQSARRPFT
(PRED) HsMTA2 -----NRA KLLAKNRQTF LLQTTKLT RL ARRMCRDLIQ PRRAARRPYA
(PRED) DrMTA3 -----GSP KSSMKTKQAF LLQATRLTKL ARHMCRDLIR LRRRAARRPFV
(PRED) DmMTA1 -----GSP RPIMKTRTAF YLHTNPMTRV ARAICRSIVK PKKAARQSA

```

```

(PRED) HlMTA1 ASGGGGGGSP R PVMKTRSAF YLR T S A L A R A A R R L C A A Q L R T R H A A R A P H Q
..... 710..... 720..... 730..... 740..... 750
(PRED) HsMTA1 P I N S A A I K A E C T A - R L P E A S Q - S P L V L K Q A V - - - - - R K P L E A V L R Y L E T H
(PRED) MmMTA1 P I N S A A I K A E C T A - R L P E A S Q - S P L V L K Q V V - - - - - R K P L E A V L R Y L E T H
(PRED) ScaMTA1 P I N S A A I K A E C T A - R L P E A S E - N P L L L K Q V V - - - - - R K P L E A V L R Y L E S H
(PRED) CmMTA1 P I N S A A I K A E C T A - R L P E I G E - K P I K L K P S V - - - - - R K T L E S I A K Y L E L H
(PRED) HsMTA2 P I N A N A I K A E C S I - R L P K A A K - T P L K I H P L V - - - - - R L P L A T I V K D L V A Q
(PRED) DrMTA3 P I N C G A I K A E Y M I - R V S E G M T G R P L K P K S S P - - - - - R S T L T S V L Q Y L E S R
(PRED) DmMTA1 A I N A M L V K Q E F T N - R I S G K S Q - A E I K K L L L L K - P K D R G S V T K I A N R L G A P
(PRED) HlMTA1 P V N A A P L R H L C A S P Q L T S K S S - V E L R I L A R A V R P R P R P R V T D I A T R L G D H
..... 760..... 770..... 780..... 790..... 800
(PRED) HsMTA1 P - - - - - - - - - - - - - - - - - - - - - R P P K P D P V K S V - - - - - - - - - - - S S V
(PRED) MmMTA1 P - - - - - - - - - - - - - - - - - - - - - R P P K P D P V K S S - - - - - - - - - - - S S V
(PRED) ScaMTA1 P - - - - - - - - - - - - - - - - - - - - - C P P K P D P A K S L - - - - - - - - - - - S S S
(PRED) CmMTA1 P - - - - - - - - - - - - - - - - - - - - - S V K P I C S L A - - - - - - - - - - - V H
(PRED) HsMTA2 A - - - - - - - - - - - - - - - - - - - - - P L K P K T P R G T - - - - - - - - - - - K - -
(PRED) DrMTA3 P - - - - - - - - - - - - - - - - - - - - - A T H V Q R P H R T - - - - - - - - - - - P G L
(PRED) DmMTA1 G - - - - S G P H E W L V L T P K D K M P L P A V V S F P K P P K A P D G S L V Y D R V P N K S P D
(PRED) HlMTA1 P A P R Q P G D W D W L A L T A A A Q R K Q P D R V S F P R P P K A P D G S L L Y E R V P N K S E V
..... 810..... 820..... 830..... 840..... 850
(PRED) HsMTA1 L S S L T P A K V A P V I N N G S P T I L G K R - - S Y E Q H N G V D G N M K K R L L M P S R G L A
(PRED) MmMTA1 L S S L T P A K S A P V I N N G S P T I L G K R - - S Y E Q H N G V D G N M K K R L L M P S R G L A
(PRED) ScaMTA1 L N N L T P A K F T P V I N N G S P T I L G K R - - S Y E Q H N G M D G N M K K R L L M P S R G L P
(PRED) CmMTA1 S G S V T P A K I L P V L N H G S P T I L G K R - - G Y E Q H N G I D G T M K K R L L M P F R G K T
(PRED) HsMTA2 - T P I N R N Q L S Q - - N R G L G G I M V K R - - A Y E T M A G - - - - - - - - - - - - - - - -
(PRED) DrMTA3 Q V Q P P R R L L S S L P S H G P L G M L G K R - - S Y H H H S R V E S A E R R A G A T G - - - - -
(PRED) DmMTA1 V V A V P A D K E L T I I P T Q A T S T I R K R A H E D Q Q L N G T E V T I V P S G P P A K R P N K
(PRED) HlMTA1 D R L T V T P P Q P Q P S M Q A Q Q T I L K R T R P P F D E I N G S D G I A L S A G L P G G P P A K
..... 860..... 870..... 880..... 890..... 900
(PRED) HsMTA1 - - - - - - - - - - - - N H G Q A R H M G P - S R N L L L N G K S Y P T K V R L I R G G S L P P V K
(PRED) MmMTA1 - - - - - - - - - - - - N H G Q T R H M G P - S R N L L L N G K S Y P T K V R L I R G G S L P P V K
(PRED) ScaMTA1 - - - - - - - - - - - - N H G Q T R Q M G P - S R N L L L N G K S Y P T K V R L I R G G S M P P V K
(PRED) CmMTA1 L A Q S C S R L H S H P N H G Q V R Q M A A V N R G Y M I N G K P Y S R S S K I L K P G S L P P M K
(PRED) HsMTA2 - - - - - - - - - - - - - - - - - - - - - A - - G V P F S A N G R P L A - - - S G I R S S S Q P A A K
(PRED) DrMTA3 - - - - - - - - - - - - - - - - - - - - - Q E N P A H I V - - G P I L Q H N G S S T G - - - G S S L R G S G L M L R
(PRED) DmMTA1 D P M P S H C P S P E Q F A A M M A A S G Q P L S R H H L N G K Q - - - - - K I A Q M A R G G N G R
(PRED) HlMTA1 R A H H S Q Q L H P K H T L E H T A P T V L P L A P P L N G R A A H P H T L P H G P P L S R S N A R
..... 910..... 920..... 930..... 940..... 950
(PRED) HsMTA1 R R R M N W I D A P D D V F Y M A T E E T R K I R K L L S S S E T K R A A R R P Y K P I A L R Q S Q
(PRED) MmMTA1 R R R M N W I D A P D D V F Y M A T E E T R K I R K L L S S S E T K R A A R R P Y K P I A L R Q S Q
(PRED) ScaMTA1 R R R M N W I D A P D D V F Y M A T E E T R K I R K L L S S S E A K R A A R R P Y K P I I L R P - -
(PRED) CmMTA1 G R R M N W I D A P D D V L F I A T E E T R K I R K L L G P V D M K R A A R Q P Y K Q I F I R Q A R
(PRED) HsMTA2 R Q K L N P A D A P N P V V F V A T K D T R A L R K A L T H L E M R R A A R R P N L P L K V K P T L
(PRED) DrMTA3 K R R P N W I D A P D D S F F L V S R E T R K A R R M L S R S Q L R R A C R Q P C E Q I S L R R V P
(PRED) DmMTA1 K Q V I S W M D A P D D V Y F R A N D T H K K T R K I L S A V D L R R A A R K P W R T L P I K P - -
(PRED) HlMTA1 K Q V I S W M D A P D D V Y F R A S D Q T K R L R K T L S S V E L R R A A R K P W R R L P A P L - -
..... 960..... 970.....
(PRED) HsMTA1 A - - - - L P P R P P P P - A P V N D E P I V I E D
(PRED) MmMTA1 A - - - - L P L R P P P P - A P V N D E P I V I E D
(PRED) ScaMTA1 - - - - - M Q A V Q L R - Q P M N D E P I I I E D
(PRED) CmMTA1 V - - - - S C A V S Q P S R Q P V N E E P I I I E D
(PRED) HsMTA2 I A V R P P V P L P A P S H P A S T N E P I V I E D
(PRED) DrMTA3 Q G P S Q V P I L A P P H P S L R M R G P I V I H D
(PRED) DmMTA1 - - - - - - - A A P E P S - S R P I E S Q I V I L D
(PRED) HlMTA1 - - - - - - - H P P H P Q R A V R G D D M V V I L D

```
