# Supplementary material
Source: PubMed Central journal article supplement (PMC4972203)
Supplement: PRO-25-1472-s003.pdf [file PRO-25-1472-s003.pdf]

# A1

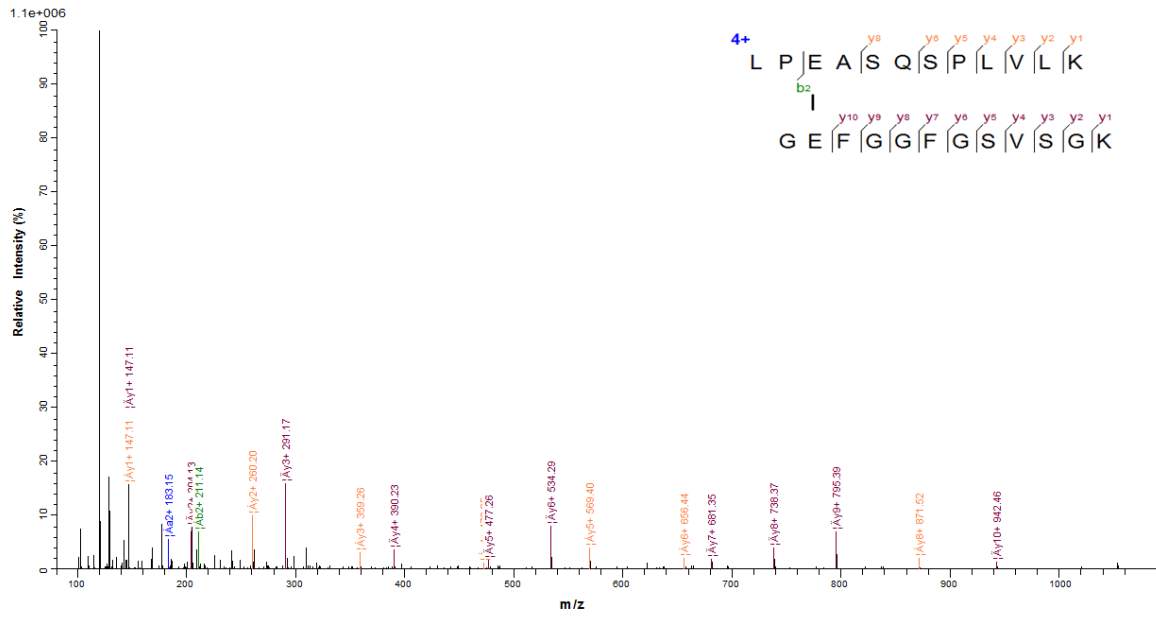

# A2

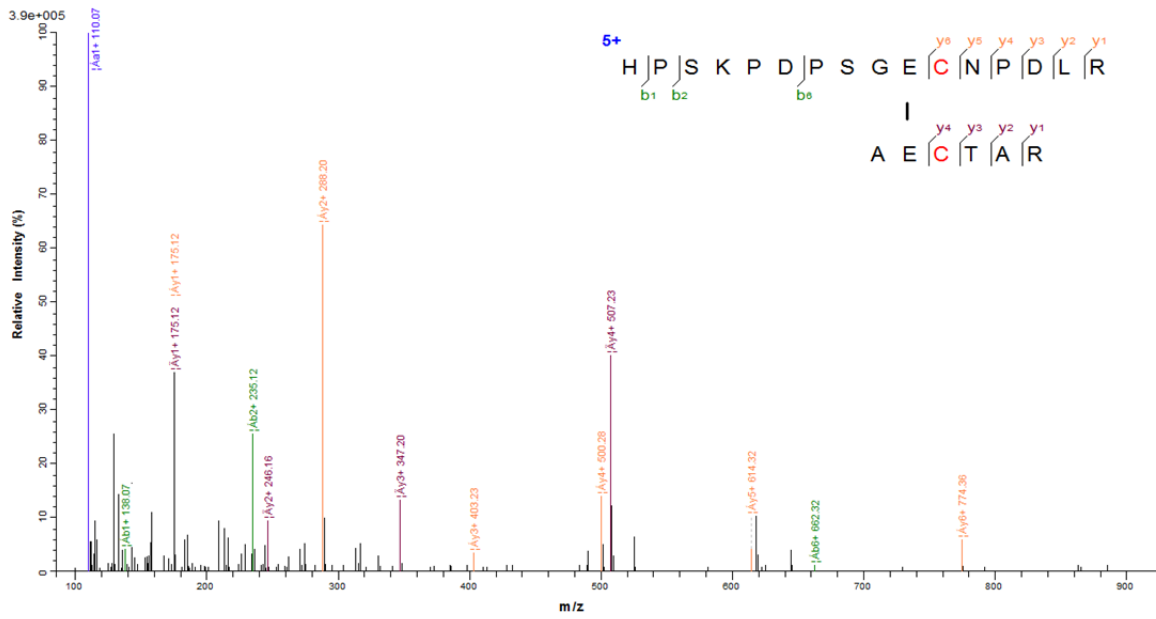

# D1

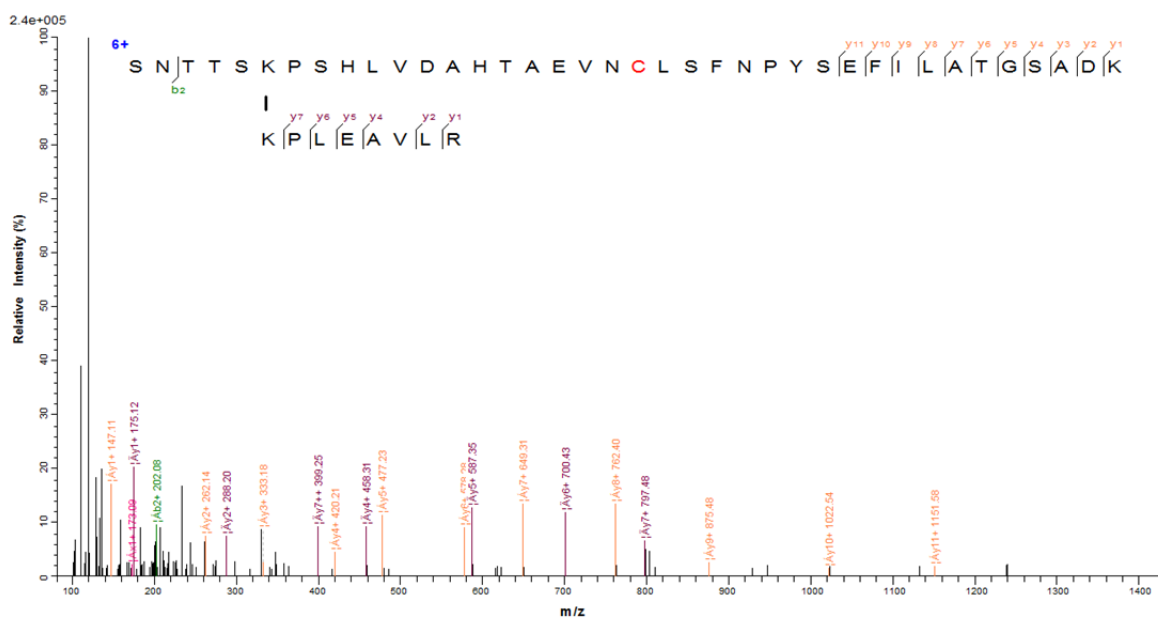

# D2

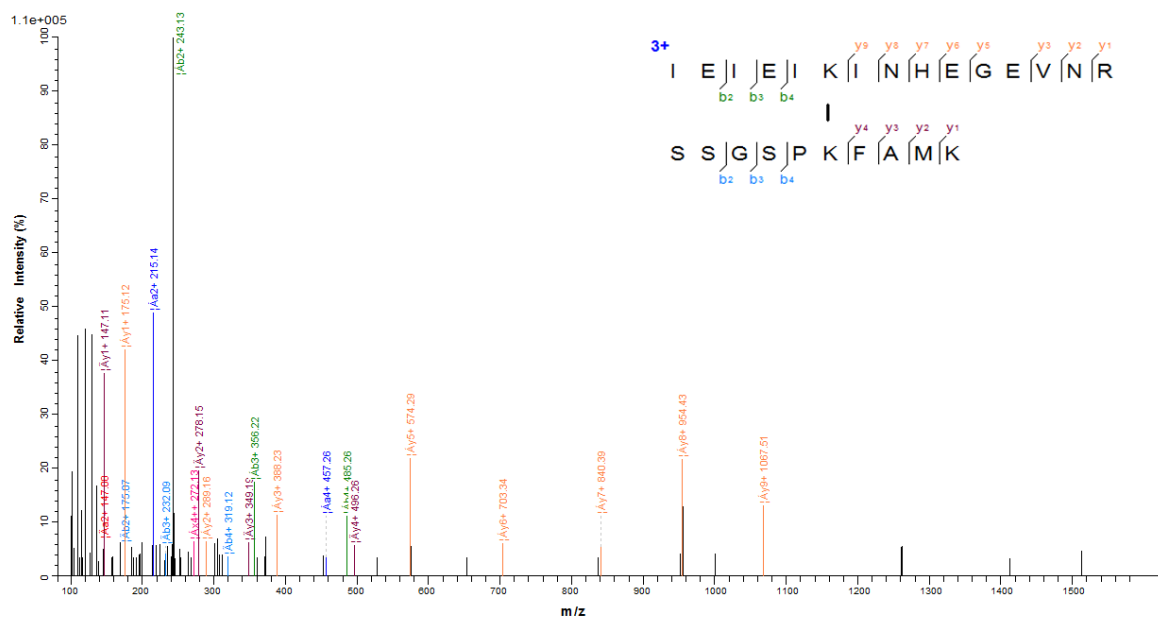

### D3

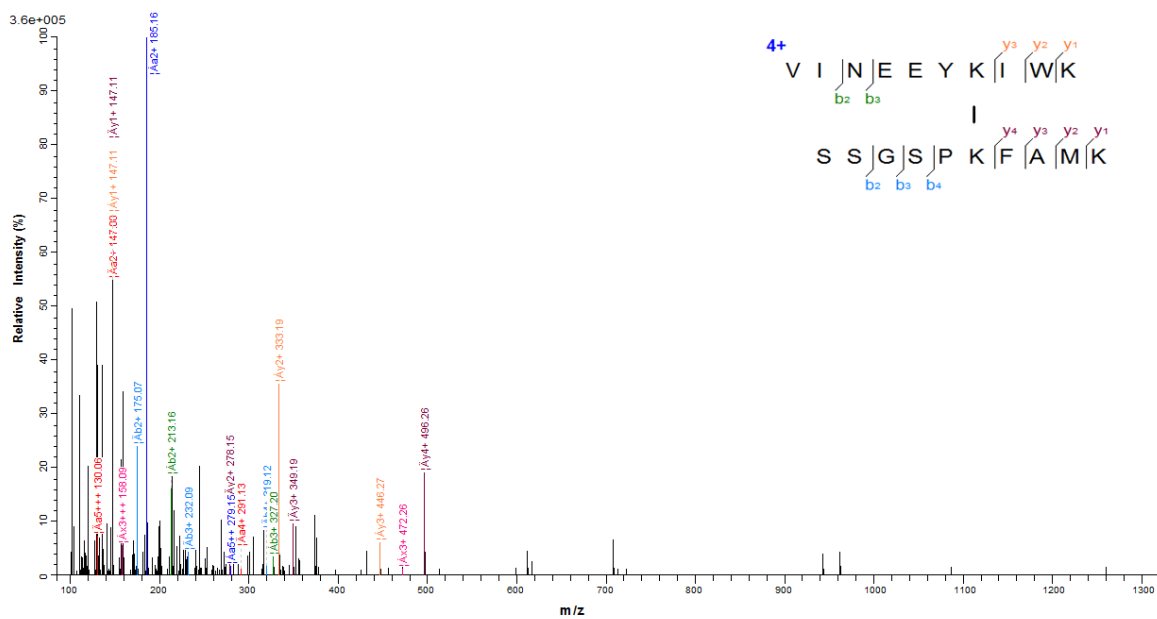

### D4

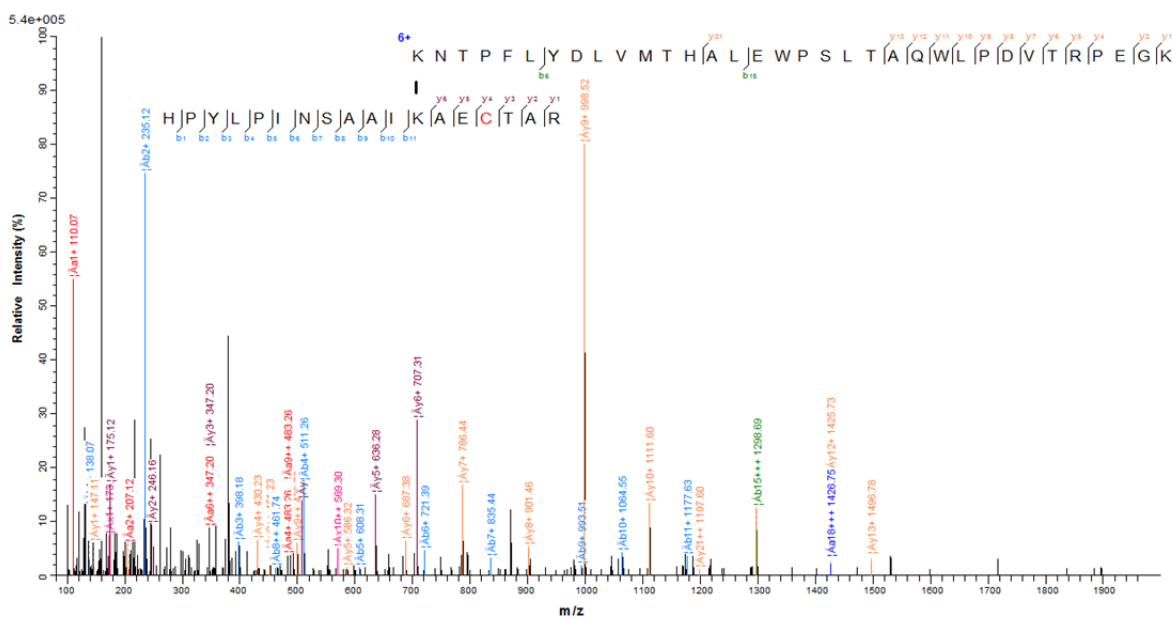

# D5

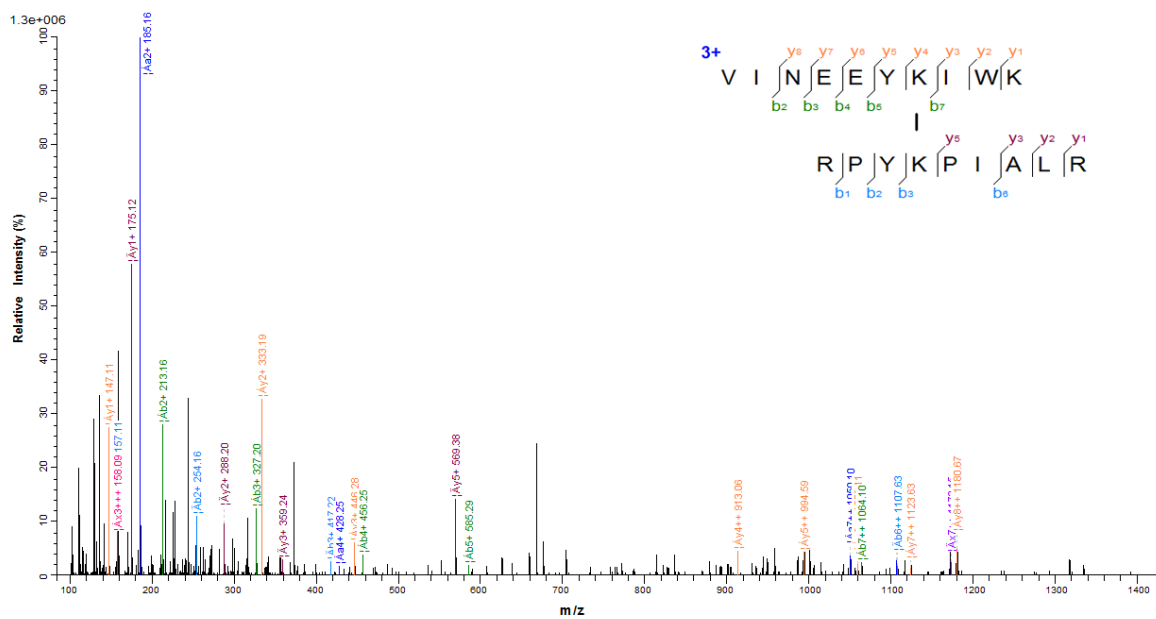

# D6

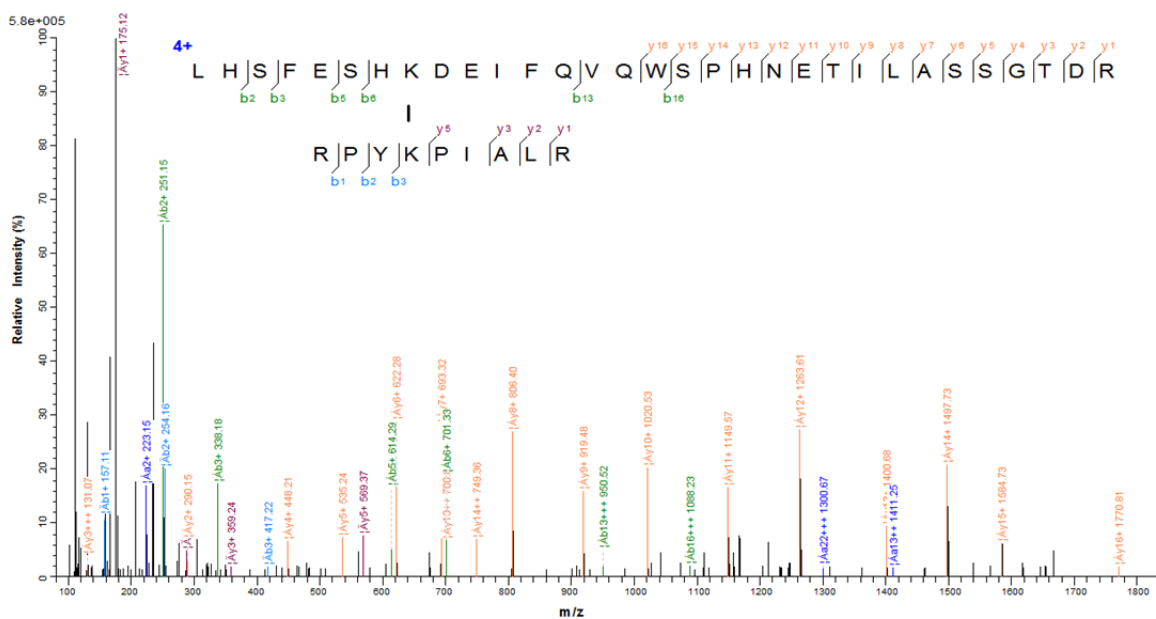

# D7

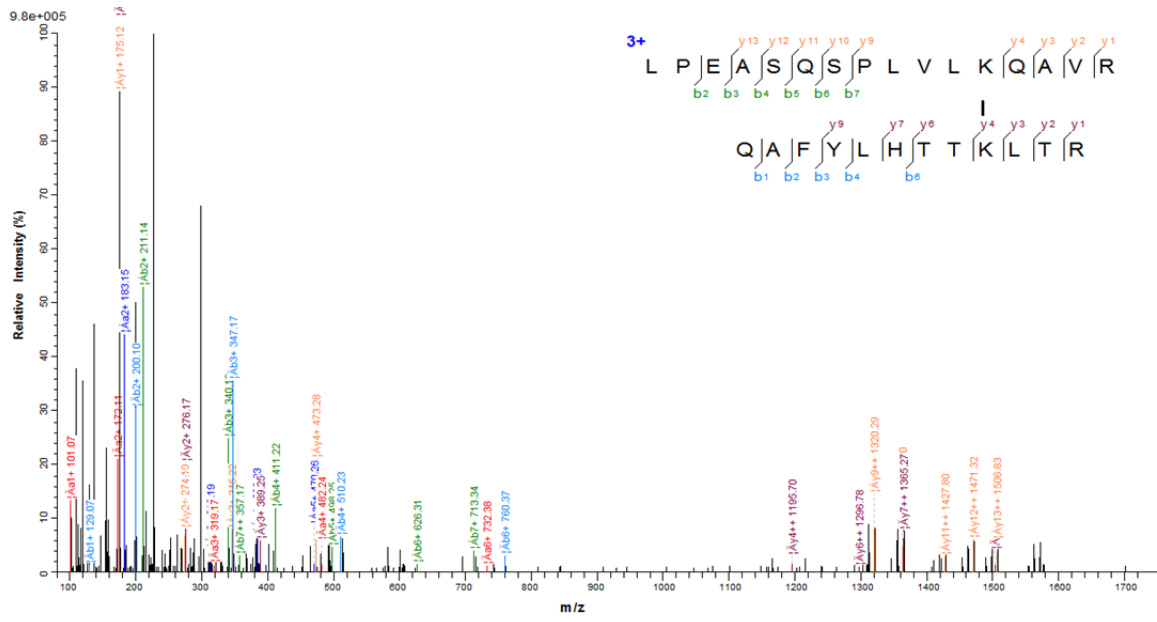

# D8

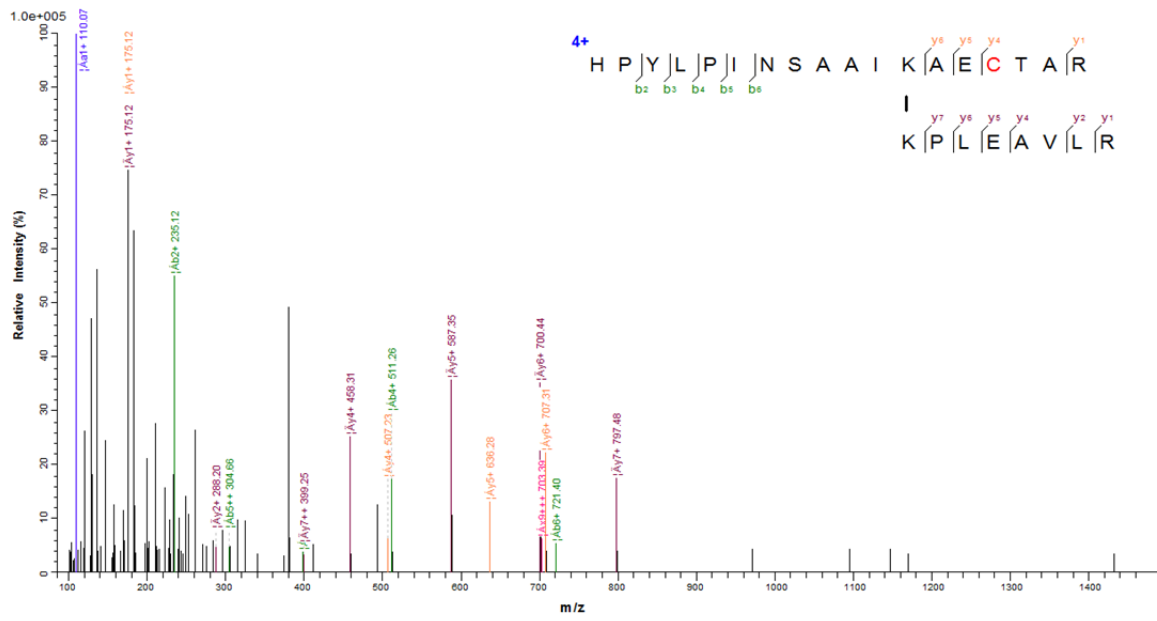

# D9

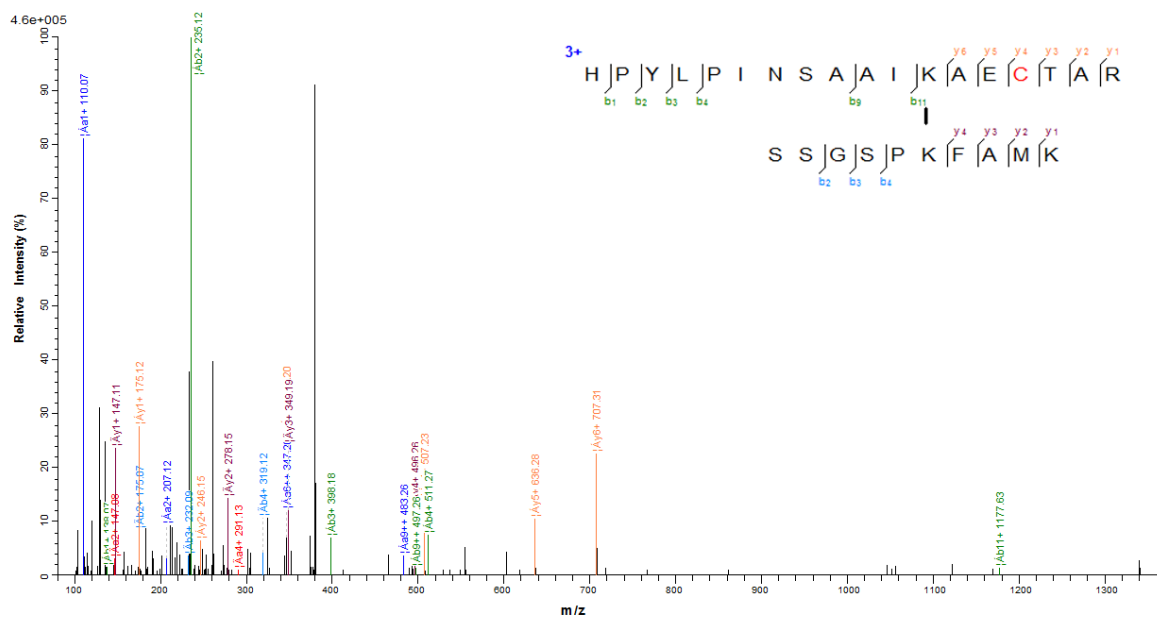

# D10

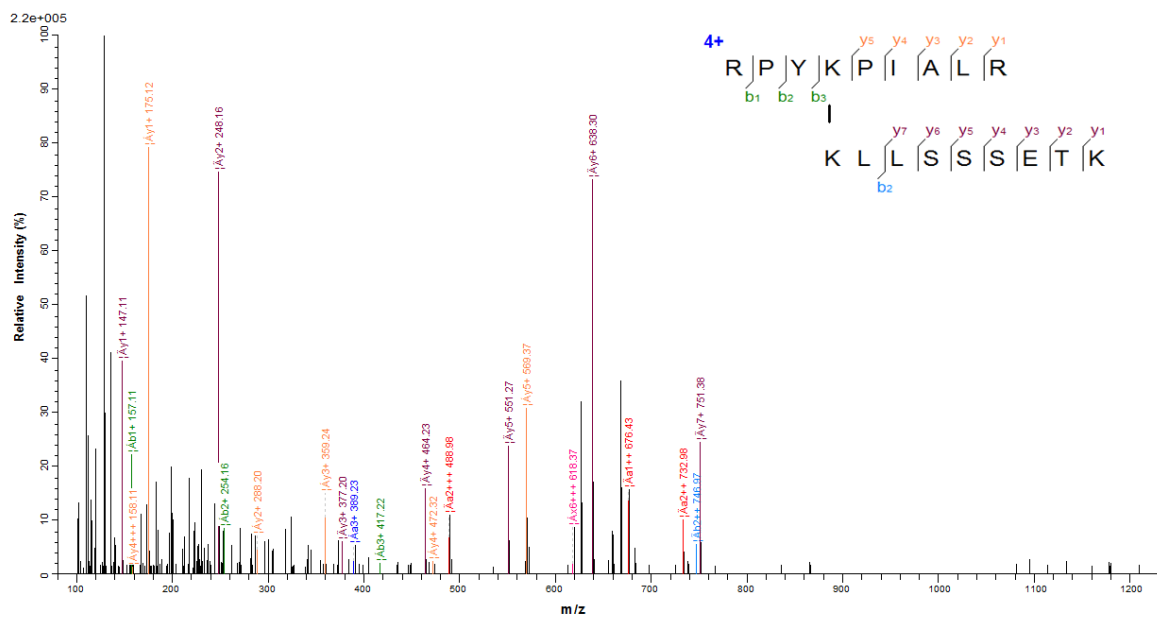

# Z1

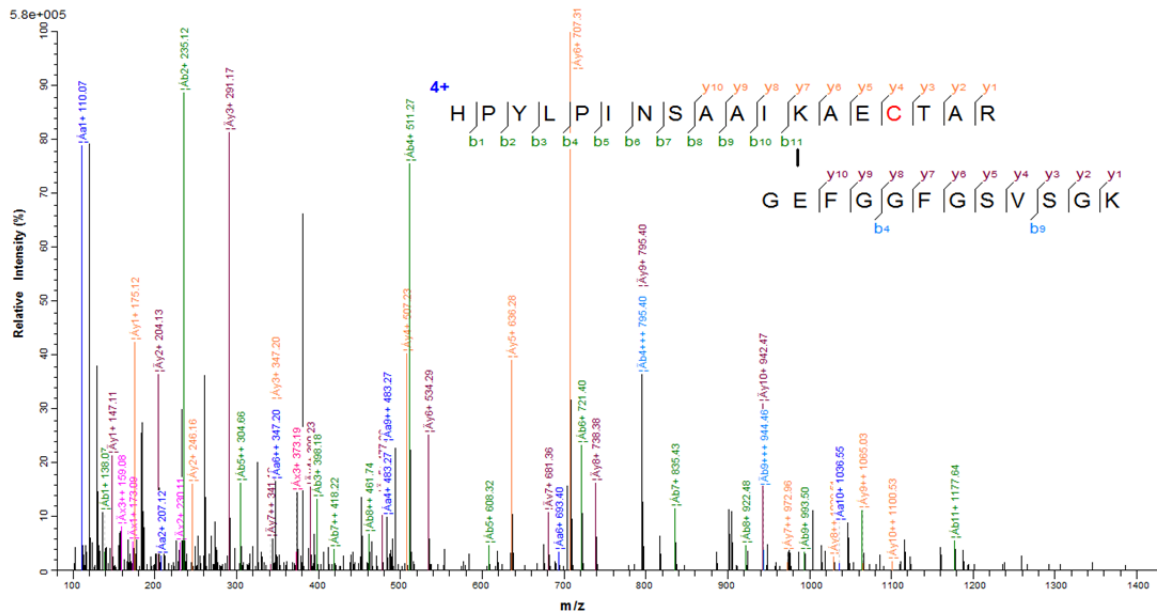

# Z2

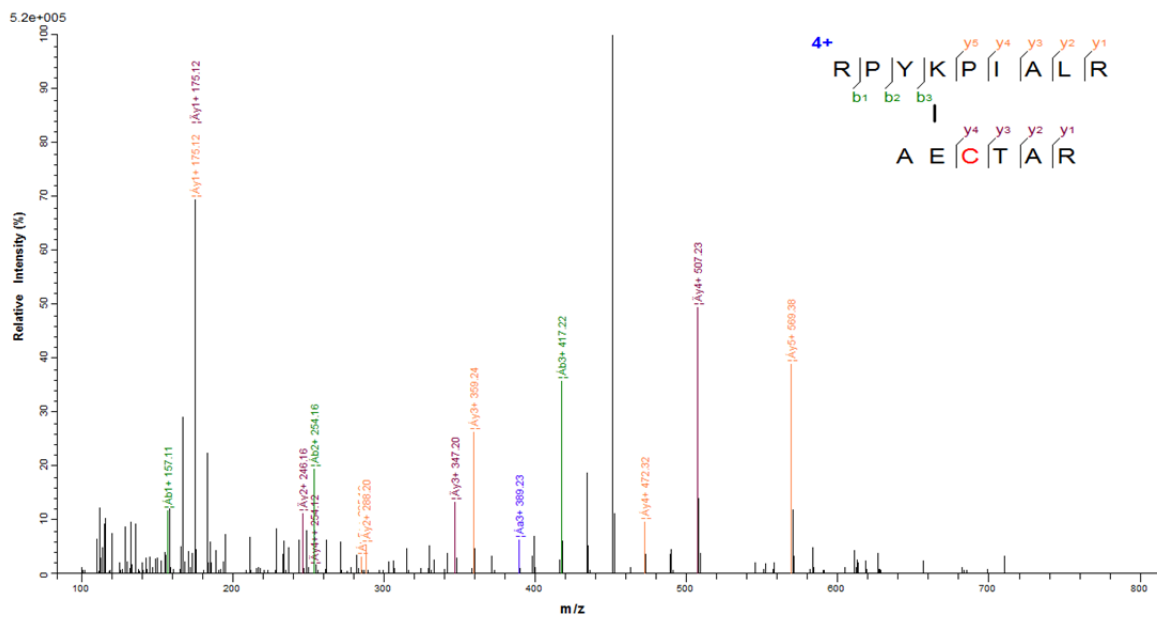

**Supplementary Figure 3.** Fragmentation spectra for the crosslinks identified in this study that were used for the EM-model. The figure panels are labelled according to the 'Id' of the crosslink used in the EM model. Alpha peptide  $y$ - and  $b$ -ions are labelled in yellow and green, respectively, while the beta peptide  $y$ - and  $b$ -ions are labelled in russet and cyan, respectively. Cysteine residues coloured in red refers to them carrying the carbamidomethyl modification.
