# Supplementary material
Source: PubMed Central journal article supplement (PMC4972203)
Supplement: PRO-25-1472-s004.pdf [file PRO-25-1472-s004.pdf]

**Supplementary Table 1. Intermolecular crosslinks found in this study.**

| Crosslinker | Crosslink type | Protein 1          | Residue | Protein 2          | Residue | Length in model (Å)             | Used as restraints in EM model (Id) |
|-------------|----------------|--------------------|---------|--------------------|---------|---------------------------------|-------------------------------------|
| DSS         | Inter-protein  | RBBP4/7            | 22/21   | MTA1               | 462     | 17.5                            | D3                                  |
| DSS         | Inter-protein  | RBBP4/7            | 22/21   | MTA1               | 686     | 25.6                            | D5                                  |
| DSS         | Inter-protein  | RBBP4              | 26      | MTA1               | 509     | 17.1                            | D4                                  |
| DSS         | Inter-protein  | RBBP4              | 120     | MTA1               | 462     | 33.2                            | D2                                  |
| DSS         | Inter-protein  | RBBP4              | 178     | MTA1               | 626     | Not in model                    | -                                   |
| DSS         | Inter-protein  | RBBP4              | 215     | MTA1               | 626     | Not in model                    | -                                   |
| DSS         | Inter-protein  | RBBP7 <sup>†</sup> | 263     | MTA1               | 532     | 28.1                            | D1                                  |
| DSS         | Inter-protein  | RBBP4              | 317     | MTA1               | 554     | Not in model                    | -                                   |
| DSS         | Inter-protein  | RBBP4              | 317     | MTA1               | 686     | 21.7                            | D6                                  |
| DSS         | Inter-protein  | RBBP4              | 156     | RBBP7 <sup>†</sup> | 119     | 84.1 (inconsistent with model)  | -                                   |
| DSS         | Inter-protein  | RBBP4              | 156     | RBBP7 <sup>†</sup> | 211     | 102.1 (inconsistent with model) | -                                   |
| DSS         | Inter-protein  | RBBP4              | 160     | RBBP7 <sup>†</sup> | 119     | 78.7 (inconsistent with model)  | -                                   |
| DSS         | Inter-protein  | MBD2/3             | 190/46  | HDAC1/2            | 89/90   | Not in model                    | -                                   |
| DSS         | Intra-protein  | RBBP7 <sup>†</sup> | 119     | RBBP7 <sup>†</sup> | 159     | 6.2                             | -                                   |
| DSS         | Intra-protein  | RBBP4              | 120     | RBBP4              | 160     | 6.2                             | -                                   |
| DSS         | Intra-protein  | RBBP4              | 156     | RBBP4              | 215     | 14.5                            | -                                   |
| DSS         | Intra-protein  | RBBP4              | 160     | RBBP4              | 215     | 23.1                            | -                                   |
| DSS         | Intra-protein  | MTA1               | 447     | MTA1               | 527     | 25.9                            | D7                                  |
| DSS         | Intra-protein  | MTA1               | 462     | MTA1               | 509     | 19.7                            | D9                                  |
| DSS         | Intra-protein  | MTA1               | 509     | MTA1               | 532     | 27.0                            | D8                                  |

|     |               |                     |         |                   |        |                              |     |
|-----|---------------|---------------------|---------|-------------------|--------|------------------------------|-----|
| DSS | Intra-protein | MTA1                | 527     | MTA1              | 532    | 13.8                         | -   |
| DSS | Intra-protein | MTA1                | 532     | MTA1              | 549    | Not in model                 | -   |
| DSS | Intra-protein | MTA1                | 532     | MTA1              | 554    | Not in model                 | -   |
| DSS | Intra-protein | MTA1                | 532     | MTA1              | 582    | Not in model                 | -   |
| DSS | Intra-protein | MTA1                | 532     | MTA1              | 686    | 50 (inconsistent with model) | -   |
| DSS | Intra-protein | MTA1                | 532     | MTA1              | 626    | Not in model                 | -   |
| DSS | Intra-protein | MTA1                | 582     | MTA1              | 670    | Not in model                 | -   |
| DSS | Intra-protein | MTA1                | 596     | MTA1              | 626    | Not in model                 | -   |
| DSS | Intra-protein | MTA1                | 626     | MTA1              | 686    | Not in model                 | -   |
| DSS | Intra-protein | MTA1                | 626     | MTA1              | 670    | Not in model                 | -   |
| DSS | Intra-protein | MTA1                | 670     | MTA1              | 686    | 22.0                         | D10 |
| DSS | Intra-protein | MTA2/3 <sup>†</sup> | 285/288 | MTA2 <sup>†</sup> | 323    | Not in model                 | -   |
| DSS | Intra-protein | MTA2 <sup>†</sup>   | 531     | MTA2 <sup>†</sup> | 539    | Not in model                 | -   |
| DSS | Intra-protein | MTA2 <sup>†</sup>   | 611     | MTA2 <sup>†</sup> | 618    | Not in model                 | -   |
| DSS | Intra-protein | CHD4                | 959     | CHD4              | 969    | Not in model                 | -   |
| DSS | Intra-protein | HDAC1               | 457     | HDAC1             | 466    | Not in model                 | -   |
| DSS | Intra-protein | HDAC2               | 462     | HDAC2             | 468    | Not in model                 | -   |
| DSS | Intra-protein | MBD3                | 41      | MBD2/3            | 46/190 | Not in model                 | -   |
| DSS | Intra-protein | MBD3                | 114     | MBD3              | 124    | Not in model                 | -   |
| DSS | Intra-protein | GATA2DA             | 27      | GATA2DA           | 30     | Not in model                 | -   |
| DSS | Intra-protein | GATA2DA             | 451     | GATA2DA           | 459    | Not in model                 | -   |
| ADH | Inter-protein | RBBP4               | 104     | MTA1              | 518    | 22.9                         | A1  |
| ADH | Inter-protein | RBBP4               | 166     | MTA1              | 511    | 30.7                         | A2  |

|      |               |         |         |         |       |                                |    |
|------|---------------|---------|---------|---------|-------|--------------------------------|----|
| ADH  | Intra-protein | RBBP4   | 5       | RBBP4/7 | 20/19 | 21.1                           | -  |
| ADH  | Intra-protein | RBBP4   | 60      | RBBP4   | 104   | 22.1                           | -  |
| ADH  | Intra-protein | RBBP4/7 | 124/123 | RBBP4   | 166   | 7.7                            | -  |
| ADH  | Intra-protein | RBBP4/7 | 148/147 | RBBP4   | 166   | 15.4                           | -  |
| ADH  | Intra-protein | RBBP4/7 | 153/152 | RBBP4   | 162   | 16.1                           | -  |
| ADH  | Intra-protein | MTA1    | 488     | MTA1    | 518   | 41.3 (inconsistent with model) | -  |
| ADH  | Intra-protein | MTA1    | 511     | MTA1    | 518   | 15.1                           | -  |
| ZLXL | Inter-protein | RBBP4/7 | 20/19   | MTA1    | 582   | Not in model                   | -  |
| ZLXL | Inter-protein | RBBP4   | 104     | MTA1    | 509   | 19.5*                          | Z1 |
| ZLXL | Inter-protein | RBBP4/7 | 124/123 | MTA1    | 582   | Not in model                   | -  |
| ZLXL | Intra-protein | RBBP4/7 | 148/147 | RBBP4   | 215   | 12.2                           | -  |
| ZLXL | Intra-protein | MTA1    | 488     | MTA1    | 582   | Not in model                   | -  |
| ZLXL | Intra-protein | MTA1    | 511     | MTA1    | 686   | 16.4                           | Z2 |
| ZLXL | Intra-protein | MTA2    | 523     | MTA2    | 539   | Not in model                   | -  |
| ZLXL | Intra-protein | CHD4    | 1060    | CHD4    | 1064  | Not in model                   | -  |

Notes: <sup>†</sup>Where possible, RBBP7 and MTA2 residues are mapped onto corresponding RBBP4 and MTA1 residues, respectively, in the EM model. \*While this linker distance exceeds the theoretical limit of ~14 Å, residue RBBP4<sub>104</sub> is located on a flexible loop.
